# Supplementary material
Source: publisher figshare collection journal article supplement (https://acs.figshare.com/ndownloader/files/3938356)
Supplement: Supplementary file 1 [file 3938356]

## **Supporting Information**

Ultratough ductile castor oil based hyperbranched  
polyurethane nanocomposite using functionalized  
reduced graphene oxide

*Suman Thakur, Niranjana Karak\**

---

Advanced Polymer and Nanomaterial Laboratory,  
Department of Chemical Sciences,  
Tezpur University, Tezpur 784028, India  
\*Email address: karakniranjana@yahoo.com (N. Karak)  
Tel: +91 3712-267327; Fax: +91 3712-267006.

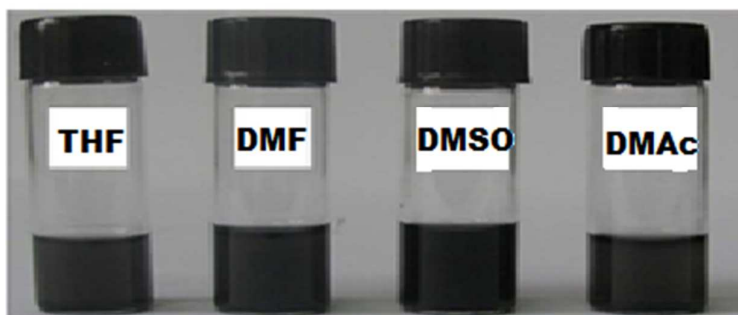

**Figure S1.** Solubility of f-RGO in different solvent after 2 months of storage.

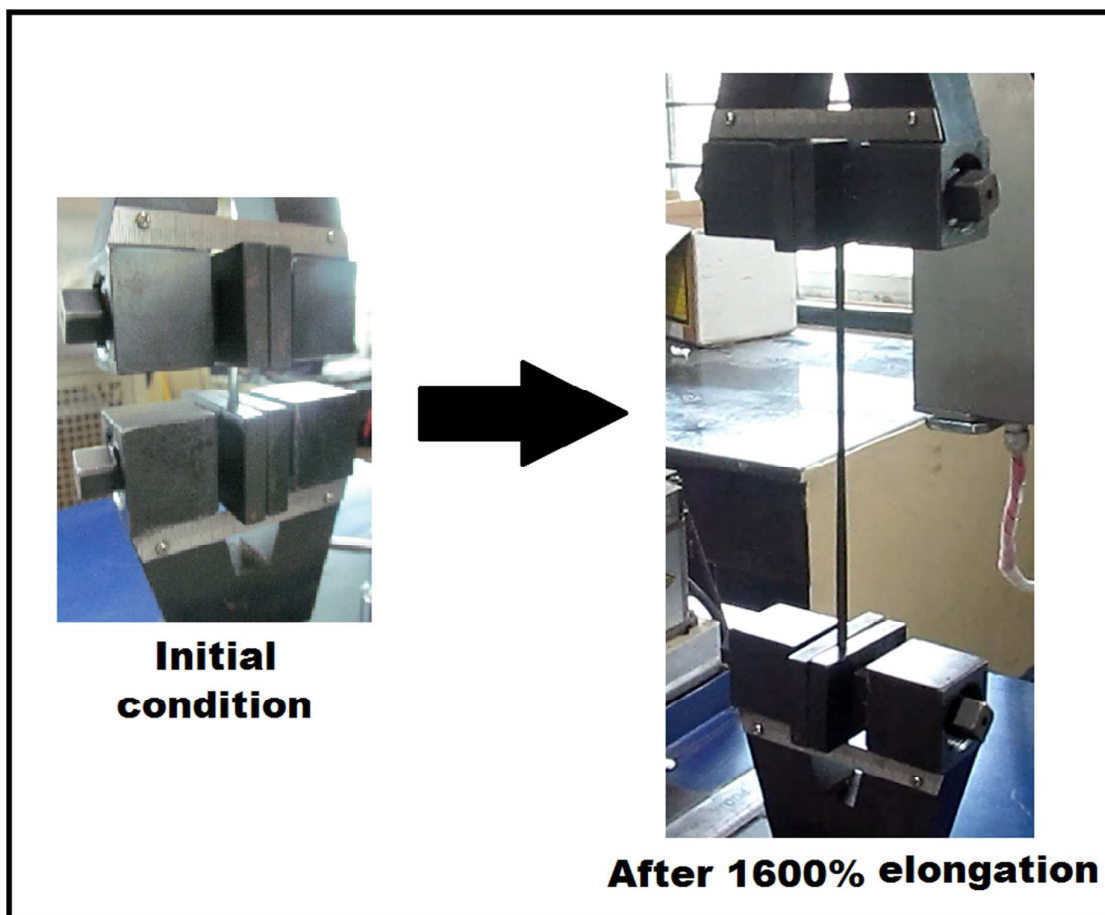

**Figure S2.** HPU/f-RGO2 film before and after stretching.

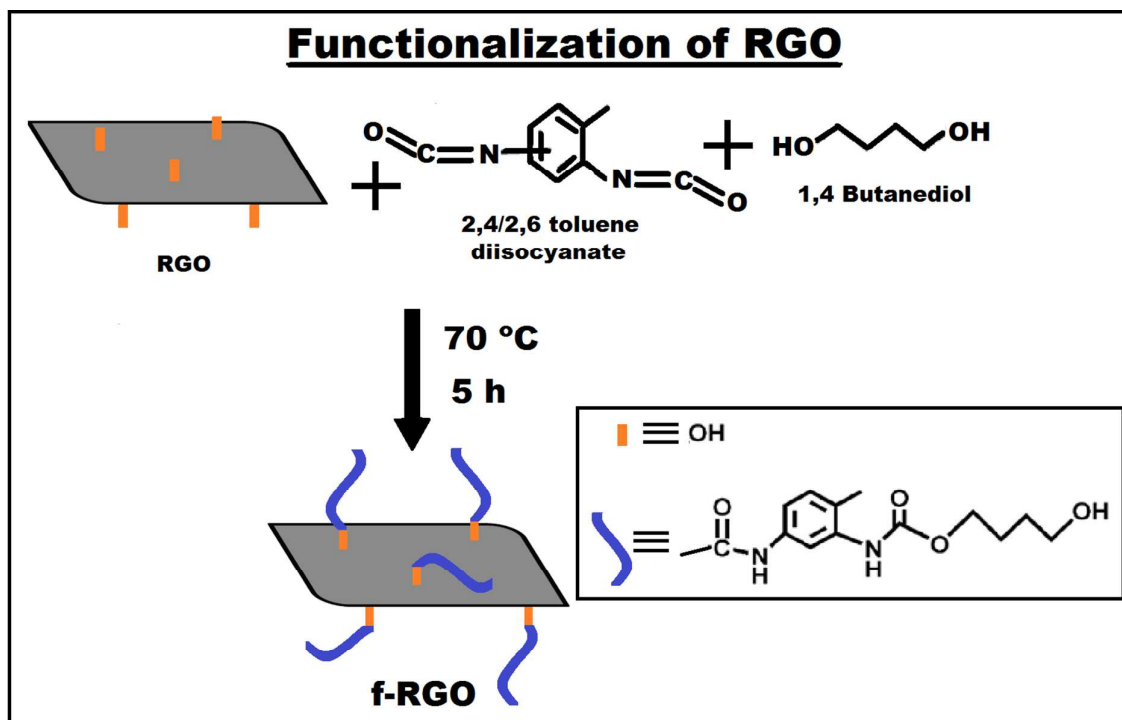

**Scheme S1** Functionalization reaction scheme of RGO.



Table S1 Crystallinity of HPU and HPU/f-RGO nanocomposites

| Sample       | T <sub>m</sub> (°C) | Crystallinity (%) |
|--------------|---------------------|-------------------|
| HPU          | 48.4                | 27.62             |
| HPU/f-RGO0.5 | 49.5                | 33.15             |
| HPU/f-RGO1   | 50.1                | 35.14             |
| HPU/f-RGO2   | 50.6                | 37.25             |
